# Supplementary material
Source: PubMed Central journal article supplement (PMC8188484)
Supplement: mmc1.pdf [file mmc1.pdf]

**iScience, Volume 24**

**Supplemental information**

**Energetic and structural features**

**of SARS-CoV-2 N-protein**

**co-assemblies with nucleic acids**

**Huaying Zhao, Di Wu, Ai Nguyen, Yan Li, Regina C. Adão, Eugene Valkov, George H. Patterson, Grzegorz Piszczek, and Peter Schuck**

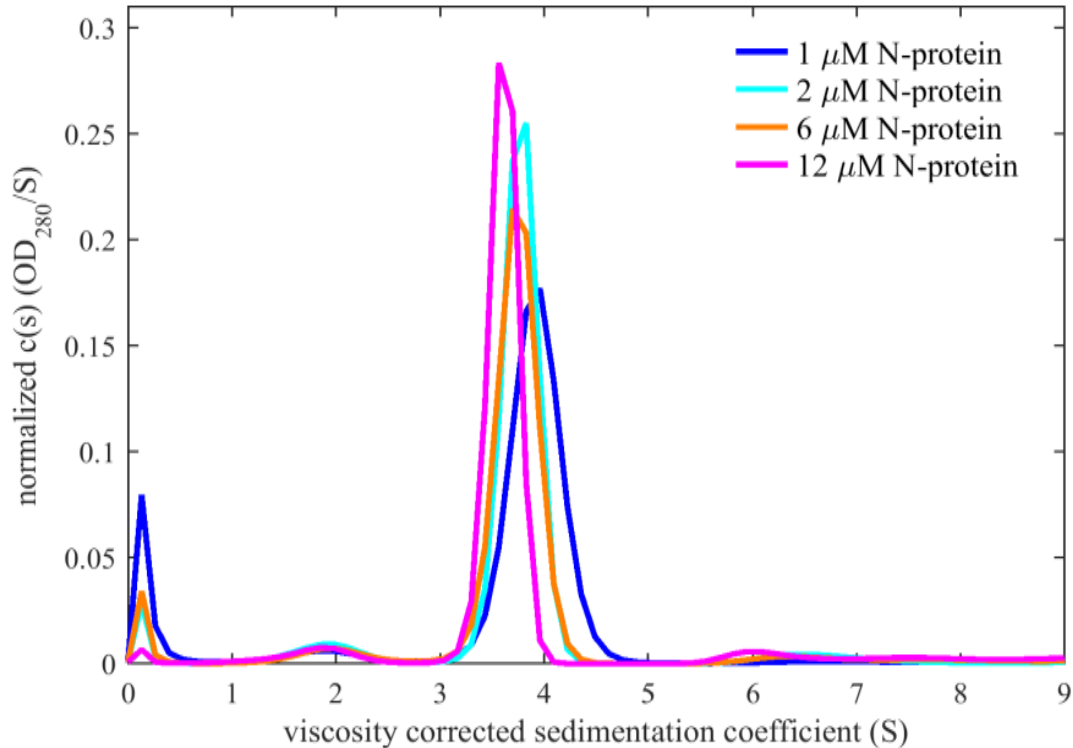

**Figure S1: Lack of N-Protein dissociation at 10 °C, related to Figure 1**

Sedimentation coefficient distributions of N-protein at 10 °C at different concentrations. Shown are normalized  $c(s)$  curves approximately corrected for viscosity ratio of water at 10 °C vs 20 °C (with remaining errors from temperature calibration uncertainties). Importantly, no concentration-dependent dissociation can be discerned (in contrast to conditions of **Figure S2**), with the small peak at 2 S representing a constant fraction of degraded protein. The slightly decreasing  $s$ -value at higher concentrations may be due to stronger hydrodynamic nonideality at lower temperatures, which is out of the scope of the present work.

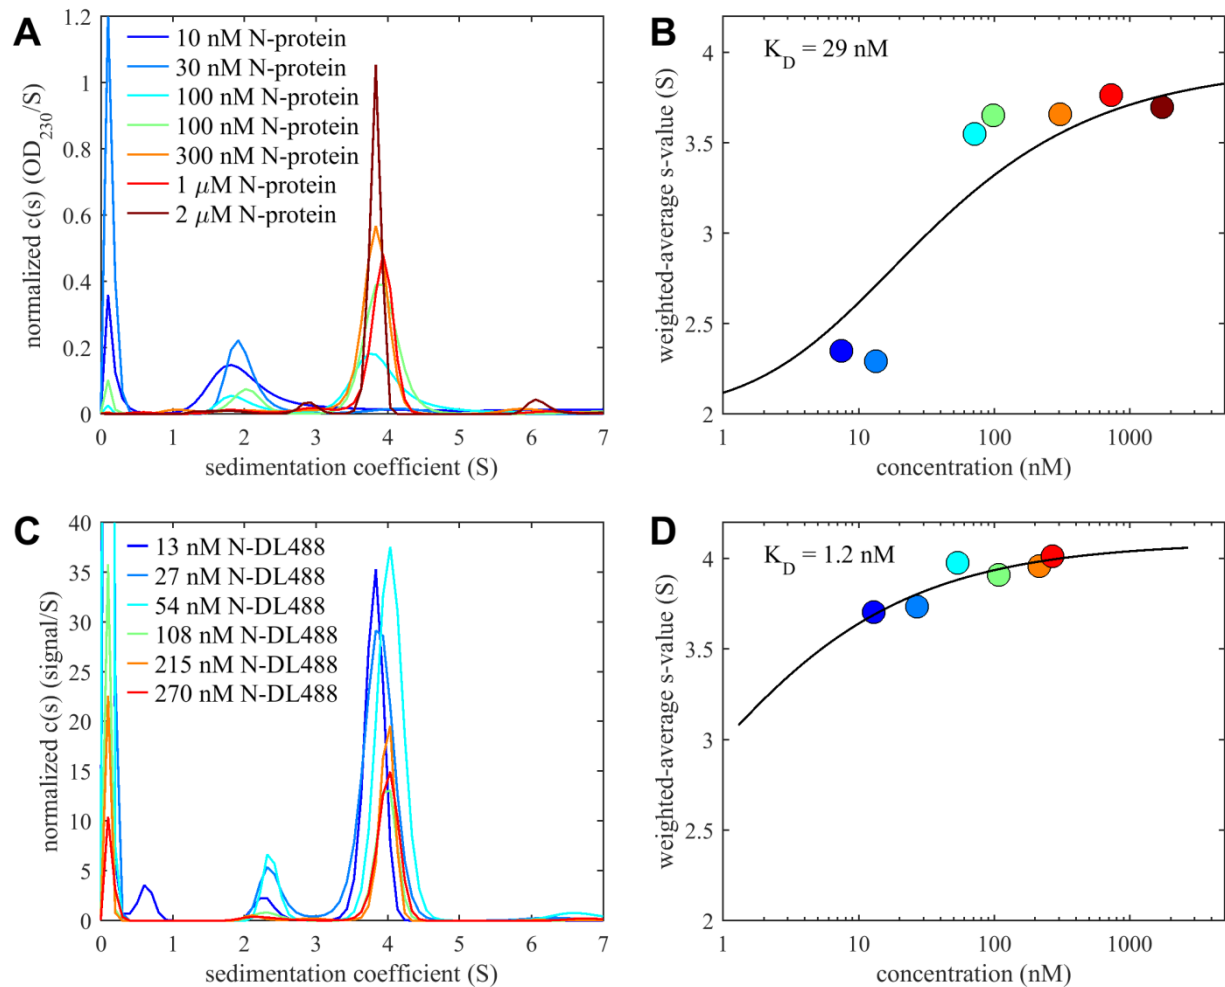

**Figure S2: N-Protein Dimer Dissociation, related to Figure 1**

(A) Sedimentation coefficient distributions of N-protein in PBS supplemented with 0.005% surfactant P20, obtained from SV-AUC experiments using far-UV detection at 230 nm. Shown are traces labeled with nominal loading concentrations (including a replicate at 100 nM).

(B) Isotherm of weight-average s-values of N-protein with P20 shown in Panel A, and best-fit monomer-dimer model. Concentrations are determined from integrated sedimentation boundary amplitudes.

(C) Sedimentation coefficient distributions of DyLight488-labeled N-protein in PBS based on SV-AUC using fluorescence detection (MacGregor et al., 2004; Zhao et al., 2013).

(D) Isotherm of weight-average s-values of DyLight-488-labeled N-protein in Panel C, and best-fit monomer-dimer model.

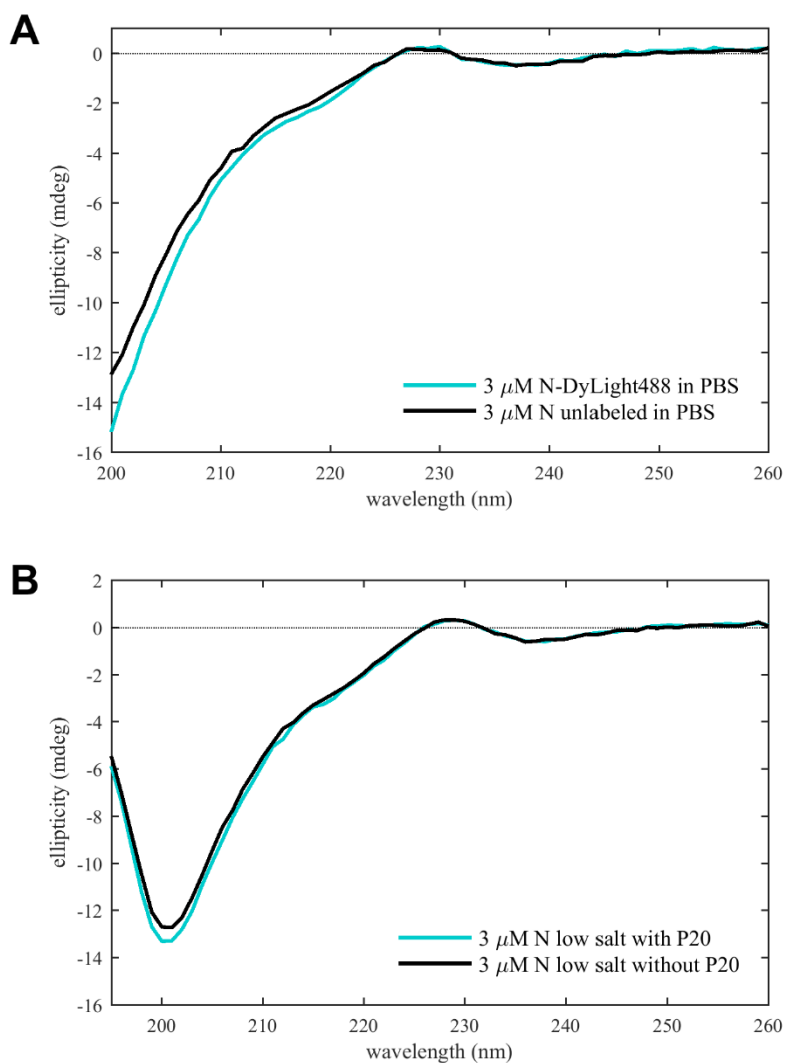

**Figure S3: Circular Dichroism Spectra of N-protein with surfactant P20 or with fluorescent tag, related to Figure 1**

(A) Comparison of CD spectra in PBS of unlabeled and DyLight488-labeled protein.

(B) Comparison of CD spectra of unlabeled N-protein in 12 mM  $\text{KH}_2\text{PO}_4/\text{Na}_2\text{HPO}_4$ , 3 mM KCl, 10 mM NaCl, pH 7.4 and in the same buffer supplemented with 0.005% P20.

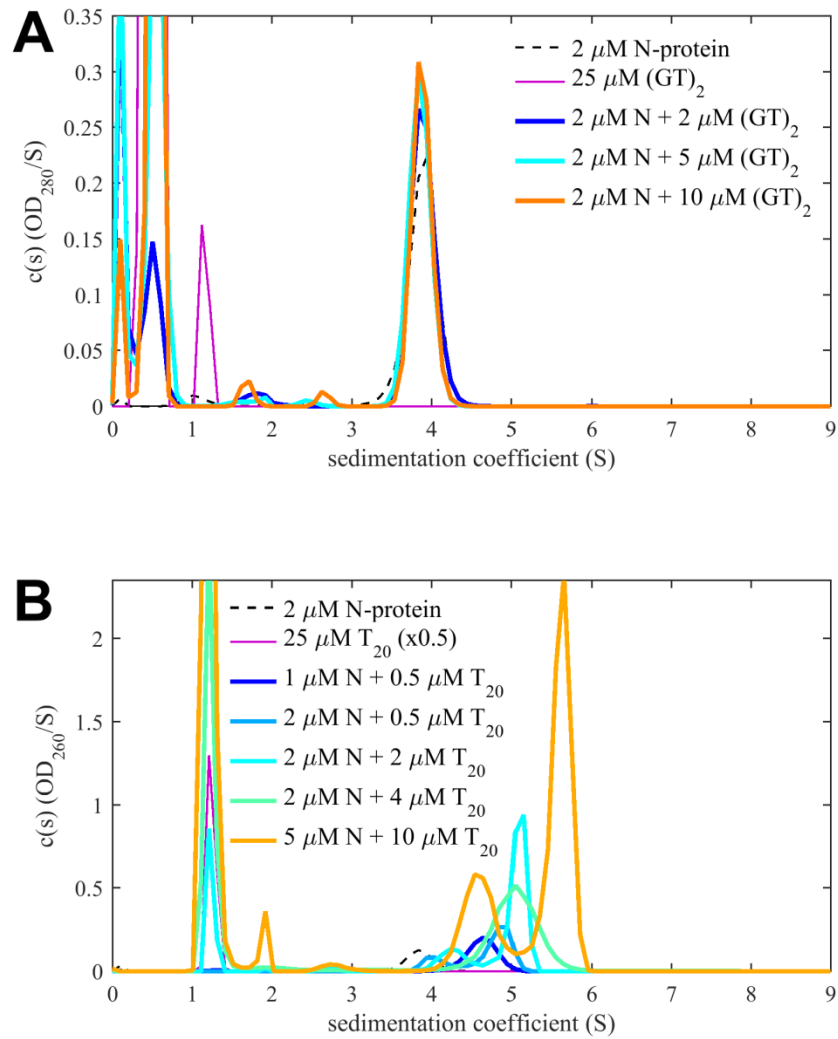

**Figure S4: Oligonucleotide binding to N-protein in high salt buffer, related to Figure 2**

(A) Sedimentation coefficient distributions of mixtures of N-protein and  $(\text{GT})_2$  in PBS show no increase in s-value and no significant increase in boundary amplitudes with  $(\text{GT})_2$  concentration.

(B) Concentration series of N-protein with  $\text{T}_{20}$  in PBS shows significant binding, but at strongly reduced level than in low salt buffer, exhibiting lower complex sedimentation coefficients. For presentation purpose, the values for the trace of 25  $\mu\text{M}$   $\text{T}_{20}$  (orange) are reduced by a factor of two.

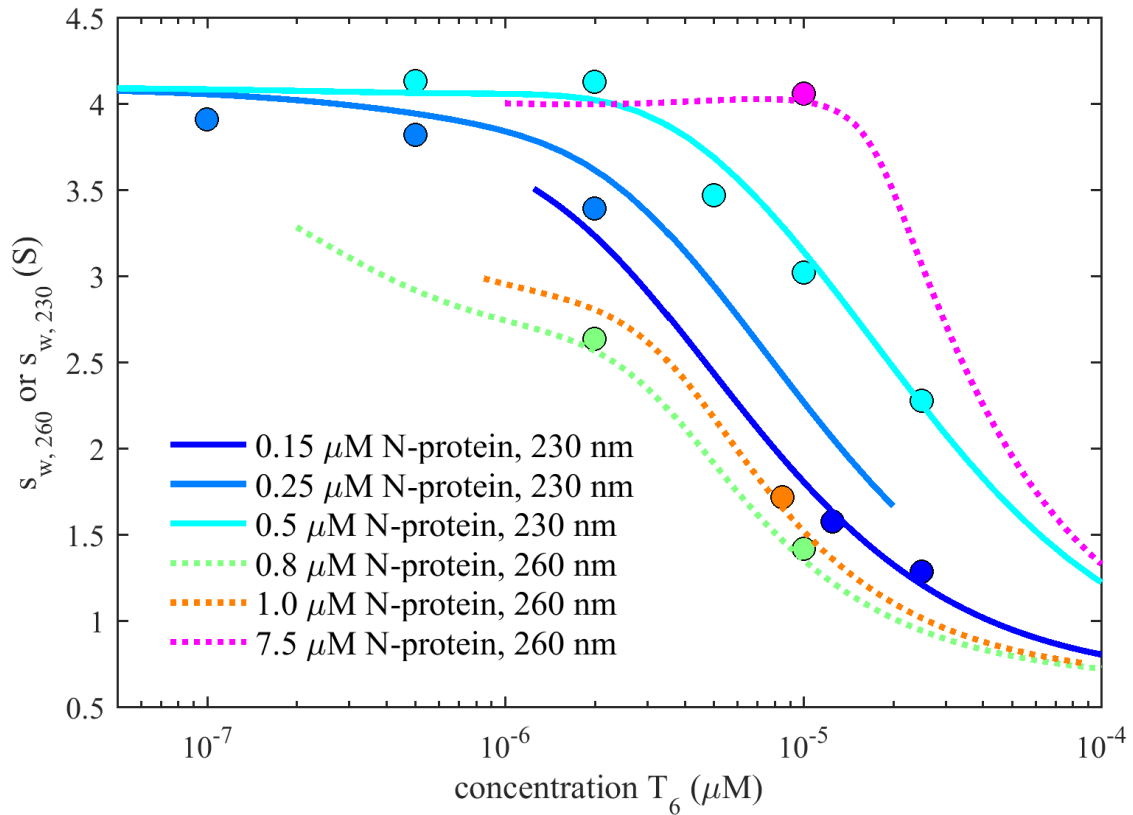

**Figure S5: Binding isotherm analysis of N-protein binding  $T_6$  in P20, related to Figure 3**

Weight-average sedimentation coefficients of mixtures of N-protein and  $T_6$  in PBS supplemented with 0.005% surfactant P20, obtained using far-UV detection at 230 nm (dark blue, light blue, and cyan) or 260 nm (green, red, magenta), respectively. The lines are from a global analysis simultaneously fitting all data points with a two-site binding model with  $s$ -values of complexes fixed to values calculated with hydrodynamic scaling laws accounting for the added mass of nucleic acid ligands to the N-protein dimer. Adjustable parameters were solely the affinities of the first and the second site, which converged to best-fit  $K_D$ -values of 0.29 and 4.1  $\mu\text{M}$ , respectively.

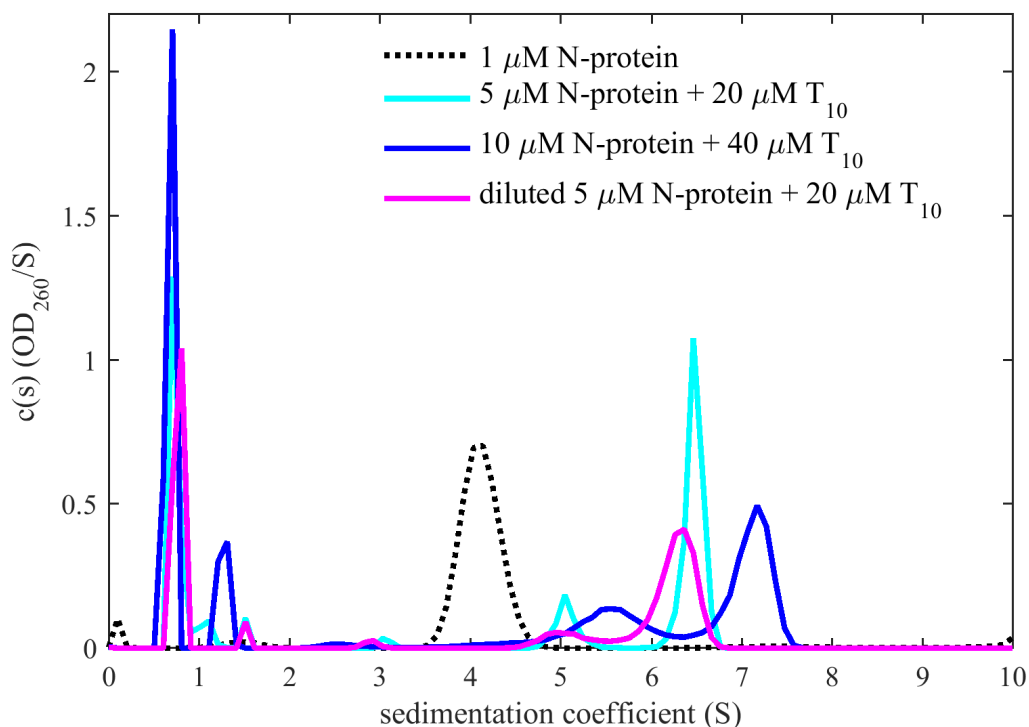

**Figure S6: Reversibility of cloudiness and oligomerization with T<sub>10</sub>, related to Figure 5**

Sedimentation coefficient distributions of N-protein in different mixtures with T<sub>10</sub> are shown. For reference, the dotted black line shows  $c(s)$  of 1  $\mu\text{M}$  N-protein alone (observed at 280 nm, tenfold enhanced). The cyan line shows the bimodal reaction boundary distribution of 5  $\mu\text{M}$  N-protein mixed with 20  $\mu\text{M}$  T<sub>10</sub>, with a peak at  $\approx 6.4$  S. Under this condition no cloudiness was observed, and the sedimenting signal of N-protein-containing ( $> 3$  S) complexes was 0.290 OD<sub>260</sub>. By contrast, significant cloudiness was observed immediately upon mixing 10  $\mu\text{M}$  N-protein with 40  $\mu\text{M}$  T<sub>10</sub>. The corresponding  $c(s)$  distribution of this sample is shown in blue, exhibiting higher time-average sedimentation coefficients with a peak at  $\approx 7.1$  S. The total signal of N-protein containing species ( $> 3$  S) is 0.390 OD<sub>260</sub> – suggesting a significant loss of signal to the rapidly sedimenting dense phase. (We would expect twice the signal of the twofold lower concentrated sample, i.e., 0.580 OD<sub>260</sub>). Prior to sedimentation, after  $\approx 15$  min of mixing, this sample was divided and an aliquot was diluted two-fold, to generate a new sample at nominally 5  $\mu\text{M}$  N-protein with 20  $\mu\text{M}$  T<sub>10</sub>. Similar to the directly mixed sample at the same nominal concentration, this diluted sample was only slightly cloudy. In the SV experiment (alongside the directly mixed samples) the  $c(s)$  distribution exhibits a peak at  $\approx 6.2$  S (magenta), indicating oligomer dissociation upon dilution. The total visible sedimenting signal of the diluted sample ( $> 3$  S) is 0.241 OD<sub>260</sub>, which is significantly more than half the signal of the initially twofold more concentrated sample (expecting 0.195 OD<sub>260</sub>), though less than the directly mixed sample. Reversibility of assembly in the diluted sample is indicated by 1) disappearance of cloudiness; 2) recovered signal of observable oligomeric protein/NA complex; 3) the decreased  $s$ -value of the diluted sample mimicking that of the directly mixed sample at the same concentration.

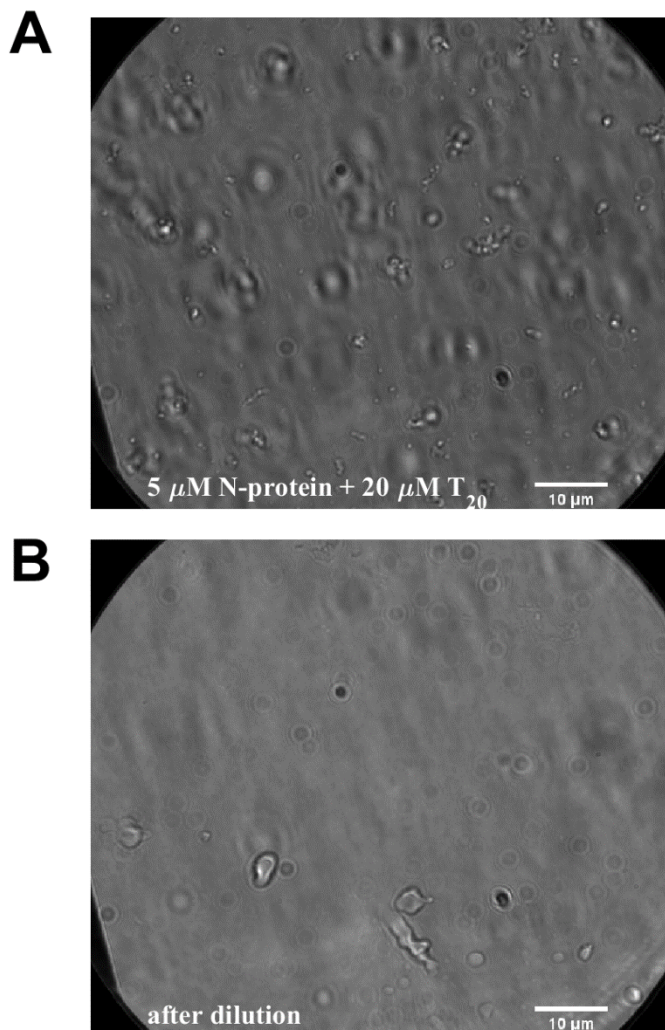

**Figure S7: Reversibility of droplet formation of N-protein with T<sub>20</sub>, related to Figure 5**

Widefield microscopy image of 5  $\mu\text{M}$  N-protein with 20  $\mu\text{M}$  T<sub>20</sub> before (A) and after (B) twofold dilution.



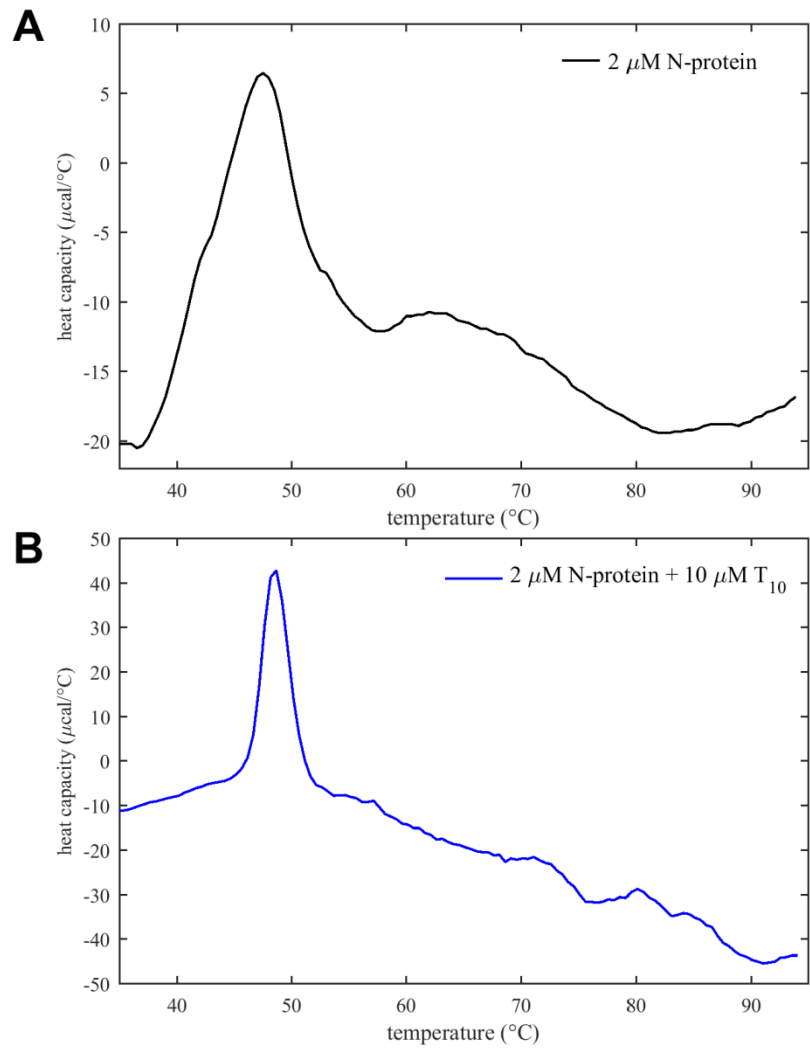

**Figure S8: Differential scanning calorimetry of N-protein with  $T_{10}$ , related to Figure 7**

Shown are DSC traces of  $2 \mu\text{M}$  N-protein in the absence (A) and presence (B) of  $10 \mu\text{M}$   $T_{10}$ .

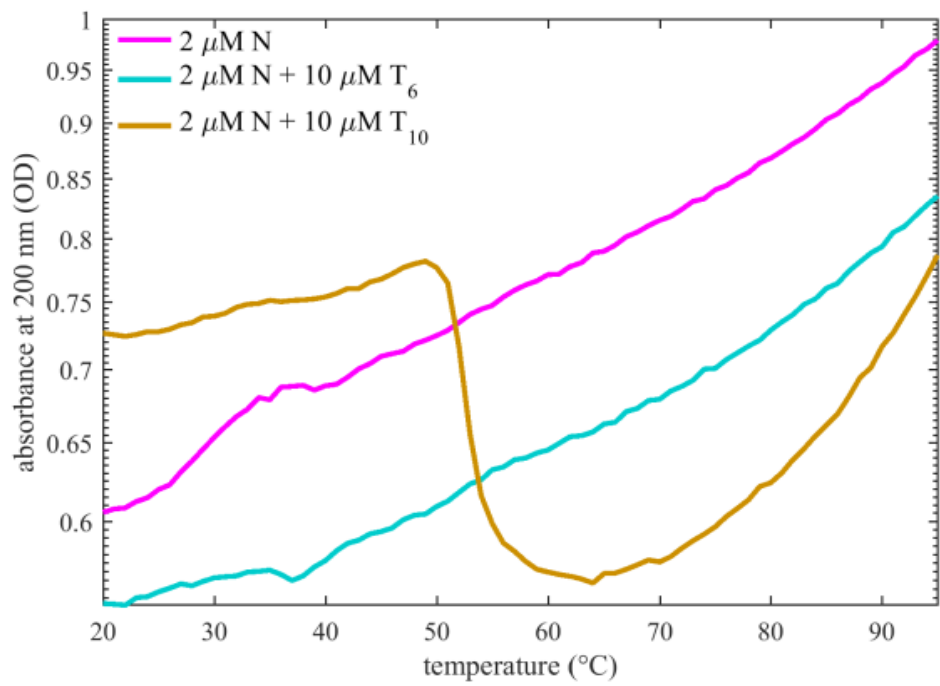

**Figure S9: Far-UV absorbance during temperature scan, related to Figure 7**

Absorbance traces at 200 nm recorded during CD temperature scans in **Figure 7**.

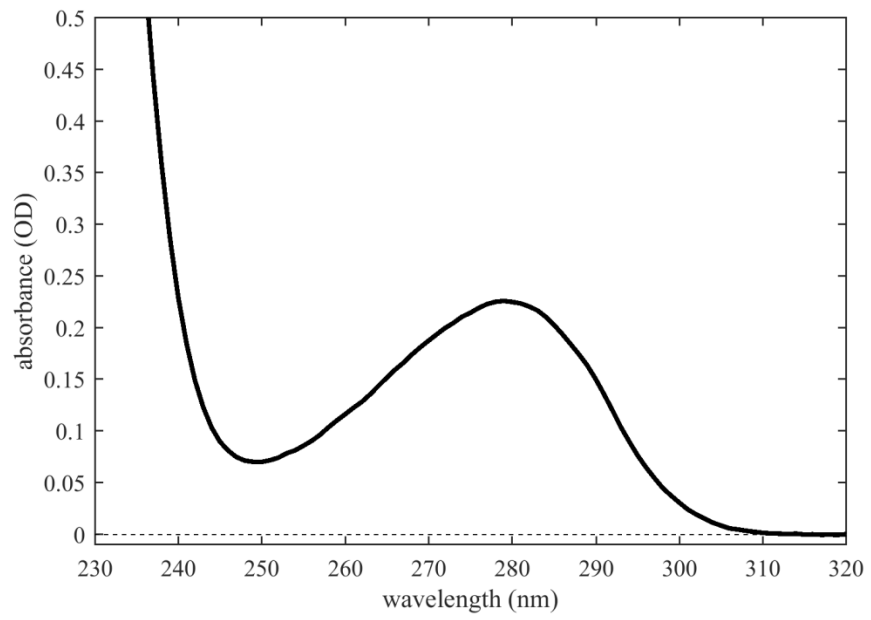

**Figure S10: Absorbance spectrum of N-protein, related to STAR Methods**

Shown is a 1:10 dilution of N-protein stock solution after dialysis against working buffer.
